# Supplementary material for: Silkworm feces extract improves iron deficiency anemia via suppressing hepcidin expression and promoting iron-regulatory proteins expression
Source: Royal Society of Chemistry journal article supplement (doi:10.1039/c7ra09576g), 2017-01-01
Supplement: c7ra09576g1.pdf [file c7ra09576g1.pdf]

Table 1S The formulations of Silkworm Feces Extract

|                           | Content (%) |
|---------------------------|-------------|
| sodium iron chlorophyllin | 34.8%       |
| chlorophyll derivative    | 64.1%       |
| others                    | 1.1%        |
